# Supplementary material for: Chronic Obstructive Pulmonary Disease Is Associated with Worse Oncologic Outcomes in Early-Stage Resected Pancreatic and Periampullary Cancers
Source: MDPI journal article supplement (doi:10.3390/biomedicines11061684), 2023-06-10
Supplement: s1 [file s1]

| Characteristic                   | Total COPD<br>(n=42) | COPD without<br>steroids (n=34) | COPD with<br>steroids (n=8) | p-value     |
|----------------------------------|----------------------|---------------------------------|-----------------------------|-------------|
| Age, y, median (IQR)             | 69 (53-86)           | 70 (66-72)                      | 68 (45-76)                  | NS          |
| Sex, n (%)                       |                      |                                 |                             | NS          |
| Male                             | 21 (50%)             | 18 (53%)                        | 3 (37%)                     |             |
| Female                           | 21 (50%)             | 16 (47%)                        | 5 (63%)                     |             |
| BMI (range), kg/m <sup>2</sup>   | 25.5 (19.1-36.6)     | 25.4 (21.2-29.1)                | 26.2 (21.9-28.3)            | NS          |
| Race, n (%)                      |                      |                                 |                             | NS          |
| White                            | 36 (85.7%)           | 30 (88.2%)                      | 6 (75.0%)                   |             |
| Black                            | 5 (11.9%)            | 3 (8.8%)                        | 2 (25.0%)                   |             |
| Asian                            | 1 (2.4%)             | 1 (3.0%)                        | 0 (0%)                      |             |
| Smoking History, n (%)           |                      |                                 |                             |             |
| Nonsmoker                        | 6 (14.3%)            | 2 (5.9%)                        | 1 (12.5%)                   | NS          |
| Past Smoker                      | 25 (59.5%)           | 21 (61.8%)                      | 7 (87.5%)                   | NS          |
| Current Smoker                   | 11 (26.2%)           | 11 (32.3%)                      | 0 (26.2%)                   | NS          |
| Neoadjuvant<br>Chemotherapy      | 4 (9.5%)             | 4 (11.8%)                       | 0 (0%)                      | NS          |
| Tumor type, n (%)                |                      |                                 |                             |             |
| PDAC                             | 38 (90.5%)           | 31 (91.2%)                      | 7 (87.5%)                   | NS          |
| Periampullary                    | 4 (9.5%)             | 3 (8.8%)                        | 1 (12.5%)                   | NS          |
| Tumor Size, mean (cm)            | 2.9 ± 1.4            | 3.2 ± 1.4                       | 2.1 ± 0.8                   | <b>0.04</b> |
| Lymph Node<br>Involvement, n (%) | 29 (69.0%)           | 25 (67.6%)                      | 4 (50.0%)                   | NS          |
| Positive Margins, n (%)          | 6 (14.3%)            | 6 (17.6%)                       | 0 (0%)                      | NS          |
| LVI, n (%)                       | 22 (52.4%)           | 19 (55.9%)                      | 3 (37.5%)                   | NS          |
| PNI, n (%)                       | 38 (90.5%)           | 31 (91.2%)                      | 7 (87.5%)                   | NS          |
| Tumor Staging , n (%)            |                      |                                 |                             |             |
| T                                |                      |                                 |                             | NS          |
| T1                               | 4 (9.5%)             | 3 (8.8%)                        | 1 (12.5%)                   |             |
| T2                               | 15 (35.7%)           | 10 (29.4%)                      | 5 (62.5%)                   |             |
| T3                               | 23 (54.8%)           | 20 (59.8%)                      | 2 (25.0%)                   |             |
| N                                |                      |                                 |                             | NS          |
| N0                               | 13 (31.0%)           | 9 (26.5%)                       | 4 (50.0%)                   |             |
| N1                               | 21 (50.0%)           | 19 (55.9%)                      | 2 (25.0%)                   |             |
| N2                               | 8 (19.0%)            | 6 (17.6%)                       | 2 (25.0%)                   |             |

**Supplementary Table S1.** Tumor and patient characteristics in the COPD subpopulation (n=42). Comparisons between steroid-dependent and non steroid-dependent patients are shown in the right most column. COPD - chronic obstructive pulmonary disease, IQR – interquartile range, PDAC - pancreatic ductal adenocarcinoma, LVI - lymphovascular invasion, PVI - perineural invasion, NS – nonsignificant.

| Overall survival          | Factor                  | HR            | <i>p</i> -value |
|---------------------------|-------------------------|---------------|-----------------|
|                           | Lymphovascular invasion | 1.4 (1.0-2.0) | 0.03            |
|                           | Perineural invasion     | 2.5 (1.2-5.1) | 0.013           |
|                           | Tumor margin positivity | 1.6 (1.0-2.4) | 0.035           |
|                           | COPD                    | 1.6 (1.0-2.6) | 0.068           |
| Disease-specific survival | Lymphovascular invasion | 1.4 (1.0-2.0) | 0.03            |
|                           | Perineural invasion     | 2.5 (1.2-5.1) | 0.013           |
|                           | Tumor margin positivity | 1.6 (1.0-2.4) | 0.03            |
|                           | Neoadjuvant treatment   | 1.5 (1.1-2.2) | 0.02            |
|                           | COPD                    | 1.5 (0.9-2.4) | 0.115           |

**Supplementary Table S2.** Cox regression analysis of prognostic factors for overall survival and disease specific survival. Regression model significance  $P < 0.01$ . COPD - chronic obstructive pulmonary disease; HR – hazard ratio.
