# Supplementary material for: Chronic Obstructive Pulmonary Disease Is Associated with Worse Oncologic Outcomes in Early-Stage Resected Pancreatic and Periampullary Cancers
Source: MDPI journal article supplement (doi:10.3390/biomedicines11061684), 2023-06-10
Supplement: s1 [file s1]

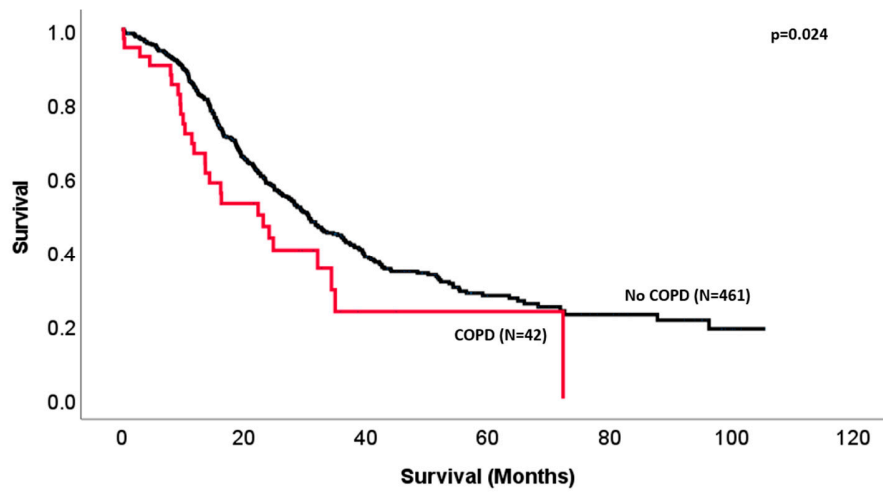

**Supplementary Figure S1.** Kaplan-Meier overall survival curve of early-stage PDAC and periampullary cancer patients who underwent pancreaticoduodenectomy, comparing survival in patients with chronic obstructive pulmonary disease (COPD) to patients with no medical history of COPD. (Median survival –  $22.4 \pm 5.4$  vs.  $30.5 \pm 1.8$  months,  $p=0.024$ ).
